# Supplementary material
Source: Royal Society of Chemistry journal article supplement (doi:10.1039/d5nj04951b)

# “Supporting Information”

## **Lithium-Decorated Porous BC<sub>2</sub>P Monolayer: A Novel High-Capacity Material for Efficient and Reversible Hydrogen Molecule Storage**

Qamar Abuhassan <sup>1,\*</sup>, Luma Hussain Saleh <sup>2</sup>, G. Padma Priya <sup>3</sup>, Subhashree Ray <sup>4</sup>, Amrita Pal <sup>5</sup>,  
Renu Sharma <sup>6</sup>, Mutabar Latipova <sup>7,8</sup>, Arofat Inkhonova <sup>9</sup>, Ruslanbek Siddikov <sup>10</sup>,  
Varagunapandiyam Natarajan <sup>11</sup>, Saiful Islam <sup>12</sup>

**Figure S1.** (a) Final structure of AIMD simulated Li@BC<sub>2</sub>P monolayer (at T=500 K, time step=1 fs) from top and side views, and (b) corresponding potential energy diagram versus simulations time

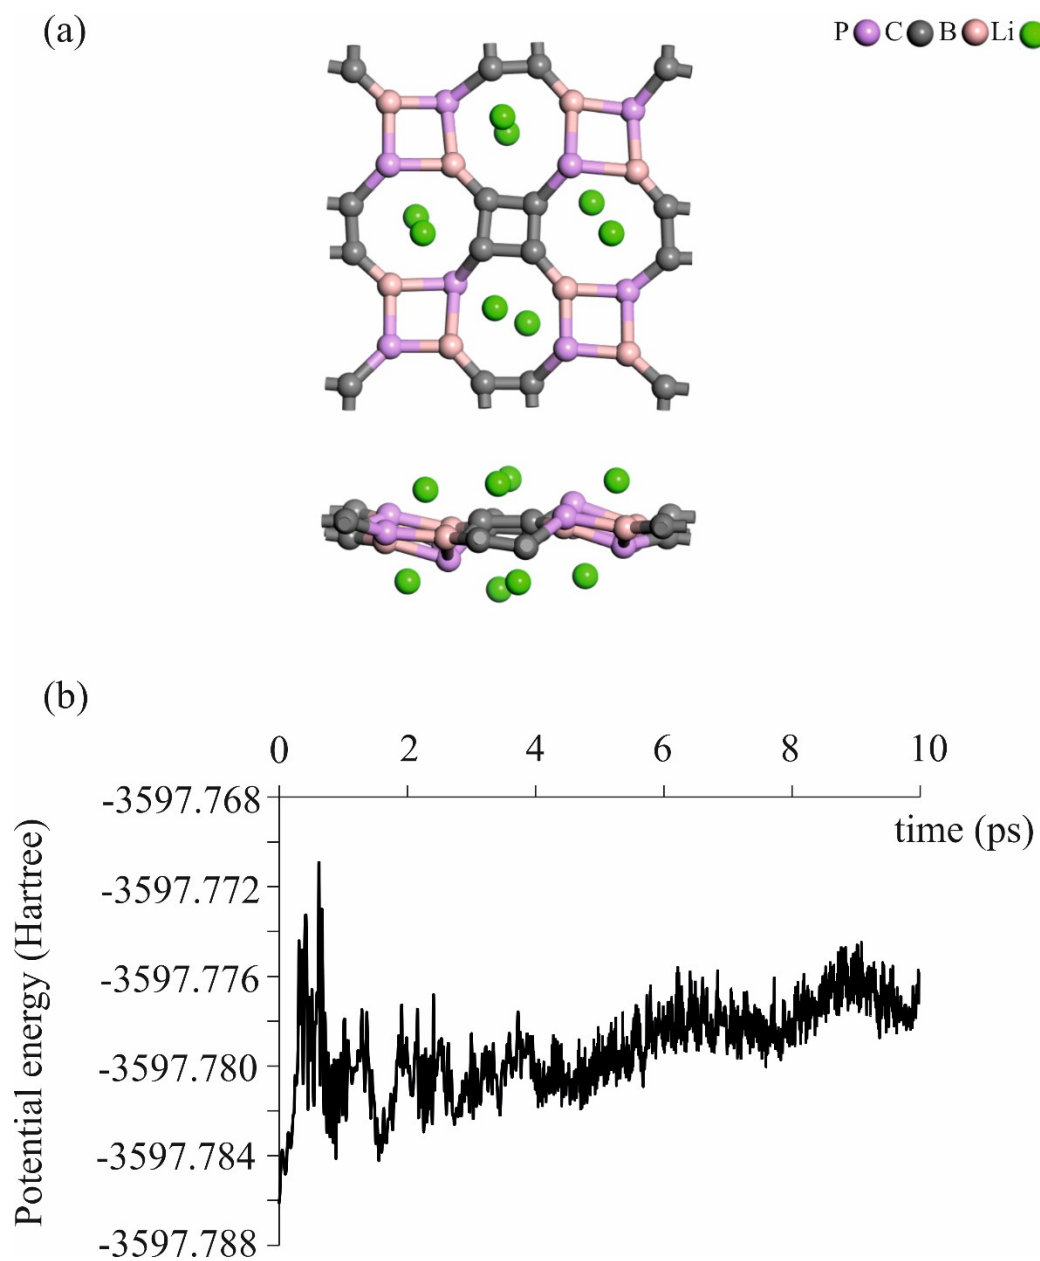

**Figure S2.** AIMD simulations and snapshots of  $24\text{H}_2/\text{Li}@BC_2\text{P}$  at  $T=300\text{ K}$  (with a time step of  $1\text{ fs}$ )

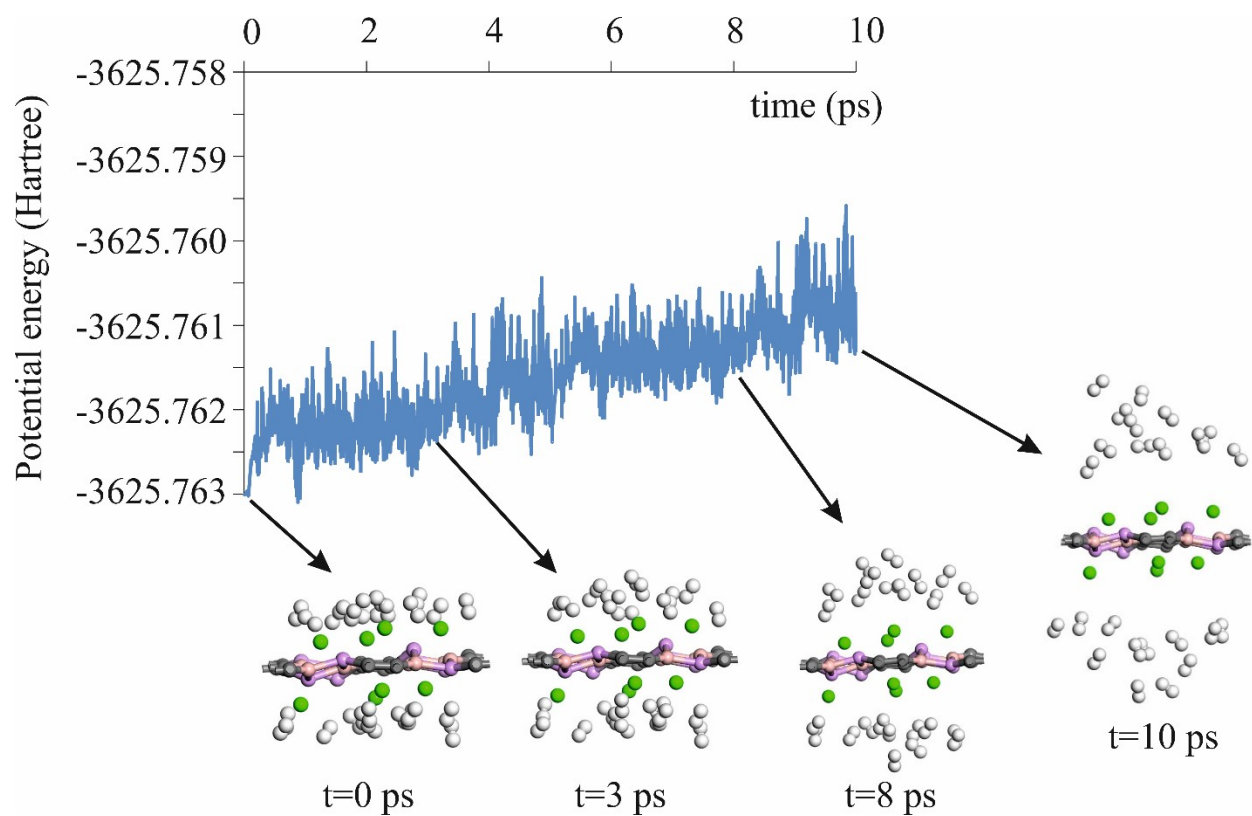

Supplement: d5nj04951b1.pdf [file d5nj04951b1.pdf]
